# Supplementary material for: Positive Selection of Squalene Synthase in Cucurbitaceae Plants
Source: Int J Genomics. 2019 May 9;2019:5913491. doi: 10.1155/2019/5913491 (PMC6532303; doi:10.1155/2019/5913491)
Supplement: Supplementary Materials — The datasets of squalene synthase in plants used in the research, including the accession number in GenBank, gene resource, family, cDNA bp, ORF length, and amino acid length. [file 5913491.f1.xlsx]

## Sheet: Sheet1
No.	Accession No.aa	Accession No.	Gene Resource	Category	Family	cDNA bp	total ORF len	AA len
1	AAF20201.1	AF205791.1	Botryococcus_braunii	Outgroup	Algae	3076	1386	461
2	AIL25719.1	KJ812994	Selaginella moellendorffii	Pteridophyte	Selaginellaceae	1985	1287	429
3	AEX58673.1	JQ004938.1	Huperzia serrata	Pteridophyte	Huperziaceae	1263	1263	420
4	AIW04729.1	KJ728647.1	Dryopteris fragrans	Pteridophyte	Dryopteridaceae	1386	1239	412
5	ABI14439.1	DQ836053.1	Taxus cuspidata	Gymnospermae	Taxacea	1765	1230	409
6	AHI96421.1	KF857540.1	Pinus massoniana	Gymnospermae	Pinacea	1230	1230	409
7	BAA22558.1	AB007502.1	Zea mays	Monocotyledon	Poacea	1911	1206	401
8	XP_002466259.1	XM_002466214.1	Sorghum bicolor	Monocotyledon	Poacea	1685	1212	403
9	BAA22557.1	AB007501.1	Oryza sativa	Monocotyledon	Poacea	1875	1212	403
10	AGW25489.1	KC442294.1	Paris polyphylla	Monocotyledon	Liliacea	1212	1212	403
11	AHB20141.2	KF551097.2	Fritillaria thunbergii	Monocotyledon	Liliacea	1230	1230	409
12	AFY63035.1	JX866770.1	Alisma plantago	Monocotyledon	Alismataceae	1577	1230	409
13	AGN32410.1	KC960673.1	Dioscorea zingiberensis	Monocotyledon	Dioscoreaceae	1453	1230	409
14	BAA06103.1	D29017.1	Arabidopsis thaliana	Dicotyledon	Brassicaceae	1744	1233	410
15	XP_010432389.1	XM_010434087.1	Camelina sativa	Dicotyledon	Brassicaceae	1659	1233	410
16	AGS78118.1	KC895980.1	Malus domestica	Dicotyledon	Rosaceae	1233	1233	410
17	AFI33135.3	JQ294055.3	Eriobotrya japonica	Dicotyledon	Rosaceae	1775	1239	412
18	ABX10442.1	EF688567.1	Gossypium hirsutum	Dicotyledon	Malvaceae	1535	1239	412
19	ABQ96265.1	EF585250.1	Psammosilene tunicoides	Dicotyledon	Caryophyllaceae	1663	1245	414
20	AAR20329.1	AY445506.1	Artemisia annua	Dicotyledon	Asteraceae	1257	1257	418
21	AAV58897.1	AY787628.1	Centella asiatica	Dicotyledon	Apiaceae	1573	1248	415
22	ACX42424.1	GQ889267.1	Bupleurum chinese	Dicotyledon	Apiaceae	1248	1248	415
23	AAY46017.1	AY964186.1	Bupleurum falcatum	Dicotyledon	Apiaceae	1248	1248	415
24	ADC32654.1	GU354313.1	Aralia elata	Dicotyledon	Araliacea	1245	1245	414
25	ABA29019.1	DQ186630.1	Panax notoginseng	Dicotyledon	Araliacea	1270	1248	415
26	BAD08242.1	AB115496.1	Panax ginseng	Dicotyledon	Araliacea	1467	1248	415
27	AED99863.1	GU997681.1	Panax quinquefolius	Dicotyledon	Araliacea	1330	1248	415
28	ADC95435.1	GU474427.1	Withania somnifera	Dicotyledon	Solanaceae	1365	1236	411
29	AAD20626.1	AF124842.1	Capsicum annuum	Dicotyledon	Solanaceae	1647	1236	411
30	AGS57530.1	JX984610.1	Solanum nigrum	Dicotyledon	Solanaceae	1236	1236	411
31	BAA82093.1	AB022599.1	Solanum tuberosum	Dicotyledon	Solanaceae	1662	1236	411
32	NP_001234716.1	NM_001247787.1	Solanum lycopersicum	Dicotyledon	Solanaceae	1628	1236	411
33	AAB08578.1	U60057.1	Nicotiana tabacum	Dicotyledon	Solanaceae	1515	1236	411
34	AAA87048.1	U46000.1	Nicotiana benthamiana	Dicotyledon	Solanaceae	1626	1236	411
35	ACR57219.1	FJ768961.1	Salvia miltiorrhiza	Dicotyledon	Lamiaceae	1242	1242	413
36	ADX01171.1	GU734711.1	Bacopa monnieri	Dicotyledon	Scrophulariaceae	1590	1245	414
37	ABG66304.1	DQ672339.1	Polygala tenuifolia	Dicotyledon	Polygalaceae	1965	1242	413
38	BAA22559.1	AB007503.1	Glycine max	Dicotyledon	Fabaceae	1590	1242	413
39	BAC56854.1	AB102688.1	Lotus japonicus	Dicotyledon	Fabaceae	1899	1242	413
40	CAJ77653.1	AM182330.1	Glycyrrhiza uralensis	Dicotyledon	Fabaceae	1239	1239	412
41	XP_003607040.1	XM_003606992.1	Medicago truncatula	Dicotyledon	Fabaceae	1272	1272	423
42	ADW27427.1	HQ829974.1	Astragalus membranaceus	Dicotyledon	Fabaceae	1242	1242	413
43	CAJ77654.1	AM182331.1	Glycyrrhiza eurycarpa	Dicotyledon	Fabaceae	1242	1242	413
44	BAA13083.1	D86409.1	Glycyrrhiza glabra	Dicotyledon	Fabaceae	1613	1242	413
45	XP_002313765.1	XM_002313729.2	Populus trichocarpa	Dicotyledon	Salicaceae	2224	1242	413
46	ADD54645.1	GU478981.1	Bruguiera gymnorhiza	Dicotyledon	Rhizophoraceae	1580	1251	416
47	BAH23428.1	AB433916.1	Euphorbia tirucalli	Dicotyledon	Euphorbiaceae	1236	1236	411
48	AFT92039.1	JX509735.1	Euphorbia pekinensis	Dicotyledon	Euphorbiaceae	1612	1236	411
49	ACQ90302.1	FJ906799.1	Gynostemma pentaphyllum	Dicotyledon	Cucurbitaceae	1496	1254	417
50		KX548327	Trichosanthes truncata	Dicotyledon	Cucurbitaceae	1983	1254	417
51		KX548332	Cucurbita moschata	Dicotyledon	Cucurbitaceae	1550	1254	417
52		KX548326	Trichosanthes rubriflos	Dicotyledon	Cucurbitaceae	1466	1254	417
53		KX548329	Trichosanthes kirilowii	Dicotyledon	Cucurbitaceae	1522	1254	417
54		KX548333	Cucumis sativus	Dicotyledon	Cucurbitaceae	1627	1254	417
55		KX548335	Benincasa hispida var. chieh-qua	Dicotyledon	Cucurbitaceae	1590	1254	417
56		KX548331	Momordica charantia	Dicotyledon	Cucurbitaceae	1548	1254	417
57		KX548330	Momordica cochinchinensis	Dicotyledon	Cucurbitaceae	1591	1254	417
58		KX548336	Luffa acutangula	Dicotyledon	Cucurbitaceae	1970	1254	417
59	AEM42980.1	HQ128565.1	Siraitia grosvenorii	Dicotyledon	Cucurbitaceae	1997	1254	417
